# Supplementary material
Source: ML conference proceedings conference paper supplement (https://proceedings.neurips.cc/paper_files/paper/2015/hash/33e8075e9970de0cfea955afd4644bb2-Abstract.html)
Supplement: Supplementary file [file 33e8075e9970de0cfea955afd4644bb2-Supplemental.zip]

---

# Precision-Recall-Gain Curves: PR Analysis Done Right *Supplementary Material*

---

**Peter A. Flach**

Intelligent Systems Laboratory  
University of Bristol, United Kingdom  
Peter.Flach@bristol.ac.uk

**Meelis Kull**

Intelligent Systems Laboratory  
University of Bristol, United Kingdom  
Meelis.Kull@bristol.ac.uk

**Theorem 1.** Let  $P_1 = (precG_1, recG_1)$  and  $P_2 = (precG_2, recG_2)$  be points in the Precision-Recall-Gain space representing the performance of Models 1 and 2 with contingency tables  $C_1$  and  $C_2$ . Then a model with an interpolated contingency table  $C_* = \lambda C_1 + (1 - \lambda)C_2$  has precision gain  $precG_* = \mu precG_1 + (1 - \mu)precG_2$  and recall gain  $recG_* = \mu recG_1 + (1 - \mu)recG_2$ , where  $\mu = (\lambda TP_1) / (\lambda TP_1 + (1 - \lambda)TP_2)$ .

**Proof:** Let us denote  $TP_* = \lambda TP_1 + (1 - \lambda)TP_2$  and  $FP_* = \lambda FP_1 + (1 - \lambda)FP_2$ . Then  $\mu = \lambda TP_1 / TP_*$  and

$$\mu \frac{FP_1}{TP_1} + (1 - \mu) \frac{FP_2}{TP_2} = \frac{\lambda TP_1}{TP_*} \frac{FP_1}{TP_1} + \frac{(1 - \lambda)TP_2}{TP_*} \frac{FP_2}{TP_2} = \frac{\lambda FP_1 + (1 - \lambda)FP_2}{TP_*} = \frac{FP_*}{TP_*}.$$

From this it follows that

$$\begin{aligned} \mu precG_1 + (1 - \mu)precG_2 &= \mu \left(1 - \frac{\pi}{1 - \pi} \frac{FP_1}{TP_1}\right) + (1 - \mu) \left(1 - \frac{\pi}{1 - \pi} \frac{FP_2}{TP_2}\right) \\ &= 1 - \frac{\pi}{1 - \pi} \left(\mu \frac{FP_1}{TP_1} + (1 - \mu) \frac{FP_2}{TP_2}\right) = 1 - \frac{\pi}{1 - \pi} \frac{FP_*}{TP_*}, \end{aligned}$$

but this is equal to  $precG_*$  since  $FP_*$  and  $TP_*$  are entries in the interpolated contingency table  $C_*$ . The proof for recall gain is identical, with  $FN$  instead of  $FP$ .  $\square$

**Theorem 2.**  $precG + \beta^2 recG = (1 + \beta^2)FG_\beta$ , with  $FG_\beta = \frac{F_\beta - \pi}{(1 - \pi)F_\beta} = 1 - \frac{\pi}{1 - \pi} \frac{FP + \beta^2 FN}{(1 + \beta^2)TP}$ .

**Proof:**

$$\begin{aligned} precG + \beta^2 recG &= 1 - \frac{\pi}{1 - \pi} \frac{FP}{TP} + \beta^2 \left(1 - \frac{\pi}{1 - \pi} \frac{FN}{TP}\right) \\ &= 1 + \beta^2 - \frac{\pi}{1 - \pi} \frac{FP + \beta^2 FN}{TP} \\ &= (1 + \beta^2) \left(1 - \frac{\pi}{1 - \pi} \frac{FP + \beta^2 FN}{(1 + \beta^2)TP}\right) \\ &= (1 + \beta^2)FG_\beta \end{aligned}$$

$\square$

**Theorem 3.** Let  $\alpha = 1/(1 + \beta^2)$  and  $\Delta_\gamma = recG/\pi - precG/\gamma$  with  $\gamma \geq 1 - \pi$ . Let the operating points of a model with area under the Precision-Recall-Gain curve  $AUPRG$  be chosen such that  $\Delta_\gamma$  is uniformly distributed within  $[-y_0/\gamma, 1/\pi]$ . Then the expected  $FG_\beta$  score is equal to

$$\mathbb{E}[FG_\beta] = \frac{(\alpha\gamma + (1 - \alpha)\pi)AUPRG + \alpha\pi y_0^2/2 + (1 - \alpha)\gamma/2}{\gamma + \pi y_0} \quad (1)$$

**Proof:** First we prove that  $\Delta_\gamma$  is monotonically increasing when lowering the threshold  $t$  to have more positive predictions. This is needed to calculate expected value of  $FG_\beta$  in terms of integrals over  $\Delta_\gamma$ . For monotonicity we prove that  $\Delta_\gamma \leq \Delta'_\gamma$  where  $\Delta_\gamma$  and  $\Delta'_\gamma$  correspond to thresholds  $t$  and  $t'$ , respectively, with  $t > t'$ . This holds if and only if:

$$\frac{recG}{\pi} - \frac{precG}{\gamma} \leq \frac{recG'}{\pi} - \frac{precG'}{\gamma} \iff \frac{precG' - precG}{\gamma} \leq \frac{recG' - recG}{\pi}$$

If  $recG' = recG$  then this holds, because then  $precG' < precG$ . Due to  $recG' \geq recG$  it is enough to prove that

$$\frac{precG' - precG}{recG' - recG} \leq \frac{\gamma}{\pi}$$

To show this we first note that for any  $x > 0$  the equality  $\frac{x-\pi}{(1-\pi)x} = \frac{1}{1-\pi}(1 - \pi\frac{1}{x})$  holds, so we have:

$$\begin{aligned} \frac{precG' - precG}{recG' - recG} &= \frac{1/prec - 1/prec'}{1/rec - 1/rec'} = \frac{(FP + TP)/TP - (FP' + TP')/TP'}{\pi n/TP - \pi n/TP'} \\ &= \frac{FP/TP - FP'/TP'}{\pi n(1/TP - 1/TP')} = \frac{FP(1/TP - 1/TP') - (FP' - FP)/TP'}{\pi n(1/TP - 1/TP')} \\ &= \frac{FP}{\pi n} - \frac{FP' - FP}{\pi n(TP'/TP - 1)} \end{aligned}$$

The first term is upper bounded by  $\frac{(1-\pi)n}{\pi n} = \frac{1-\pi}{\pi}$  because the false positives are a subset of all negatives. Since  $FP' \geq FP$  and  $TP' \geq TP$  due to more positive predictions the subtracted second term cannot be negative. Therefore, we can upper bound this quantity as follows:

$$\frac{precG' - precG}{recG' - recG} \leq \frac{1-\pi}{\pi} + 0 \leq \frac{\gamma}{\pi}$$

where the last inequality is due to  $\gamma \geq 1 - \pi$ .

This concludes the proof of monotonicity and we can now calculate expected  $FG_\beta$  over uniform  $\Delta_\gamma$  as follows:

$$\mathbb{E}[FG_\beta] = \left( \int_{-y_0/\gamma}^{1/\pi} FG_\beta d\Delta_\gamma \right) / \left( \int_{-y_0/\gamma}^{1/\pi} d\Delta_\gamma \right)$$

We have  $FG_\beta = (1 - \alpha)recG + \alpha precG$  and so

$$\begin{aligned} \mathbb{E}[FG_\beta] &= \left( \int_{-y_0/\gamma}^{1/\pi} ((1 - \alpha)\pi recG/\pi + \alpha precG - (1 - \alpha)\pi precG/\gamma + (1 - \alpha)\pi precG/\gamma) d\Delta_\gamma \right) / (1/\pi + y_0/\gamma) \\ &= \left( \int_{-y_0/\gamma}^{1/\pi} ((1 - \alpha)\pi \Delta_\gamma + (\alpha + (1 - \alpha)\pi/\gamma) precG) d\Delta_\gamma \right) \pi\gamma / (\gamma + \pi y_0) \\ &= \frac{(1 - \alpha)\pi^2\gamma}{\gamma + \pi y_0} \int_{-y_0/\gamma}^{1/\pi} \Delta_\gamma d\Delta_\gamma + \frac{\gamma\pi\alpha + (1 - \alpha)\pi^2}{\gamma + \pi y_0} \int_{-y_0/\gamma}^{1/\pi} precG d\Delta_\gamma \\ &= \frac{(1 - \alpha)\pi^2\gamma}{\gamma + \pi y_0} (1/\pi^2 - y_0^2/\gamma^2)/2 + \frac{\gamma\pi\alpha + (1 - \alpha)\pi^2}{\gamma + \pi y_0} \int_0^1 precG \frac{d\Delta_\gamma}{drecG} drecG \end{aligned}$$

Since  $\frac{d\Delta_\gamma}{drecG} = \frac{1}{\pi} - \frac{1}{\gamma} \frac{dprecG}{drecG}$ , we can rewrite the integral as follows:

$$\begin{aligned} \int_0^1 precG \frac{d\Delta_\gamma}{drecG} drecG &= \frac{1}{\pi} \int_0^1 precG drecG - \frac{1}{\gamma} \int_0^1 precG \frac{dprecG}{drecG} drecG \\ &= \frac{1}{\pi} AUPRG - \frac{1}{\gamma} \int_{y_0}^0 precG dprecG = \frac{1}{\pi} AUPRG + \frac{1}{\gamma} y_0^2/2 \end{aligned}$$

Therefore,

$$\begin{aligned}
\mathbb{E}[FG_\beta] &= \frac{(1-\alpha)\pi^2\gamma}{\gamma+\pi y_0} \cdot \frac{\gamma^2-\pi^2 y_0^2}{2\gamma^2\pi^2} + \frac{\gamma\pi\alpha+(1-\alpha)\pi^2}{\gamma+\pi y_0} \left( \frac{1}{\pi}AUPRG + \frac{1}{\gamma}y_0^2/2 \right) \\
&= \frac{(1-\alpha)(\gamma^2-\pi^2 y_0^2)}{2\gamma(\gamma+\pi y_0)} + \frac{\gamma\pi\alpha y_0^2+(1-\alpha)\pi^2 y_0^2}{2\gamma(\gamma+\pi y_0)} + \frac{\gamma\alpha+(1-\alpha)\pi}{\gamma+\pi y_0}AUPRG \\
&= \frac{(1-\alpha)\gamma^2+\gamma\pi\alpha y_0^2}{2\gamma(\gamma+\pi y_0)} + \frac{\alpha\gamma+(1-\alpha)\pi}{\gamma+\pi y_0}AUPRG \\
&= \frac{\alpha\gamma+(1-\alpha)\pi}{\gamma+\pi y_0}AUPRG + \frac{\alpha\pi y_0^2+(1-\alpha)\gamma}{2(\gamma+\pi y_0)} \\
&= \frac{(\alpha\gamma+(1-\alpha)\pi)(AUPRG+\alpha\pi y_0^2/2+(1-\alpha)\gamma/2)}{\gamma+\pi y_0}
\end{aligned}$$

□

**Corollary.** Under uniform  $\Delta_\gamma$  for  $\gamma = 1 - \pi$  the expected  $FG_1$  equals to the following:

$$\mathbb{E}[FG_1] = \frac{AUPRG/2 + 1/4 - \pi(1 - y_0^2)/4}{1 - \pi(1 - y_0)}$$

**Theorem 4.** Let two classifiers be such that  $prec_1 > prec_2$  and  $rec_1 < rec_2$ , then these two classifiers have the same  $F_\beta$  score if and only if

$$\beta^2 = -\frac{1/prec_1 - 1/prec_2}{1/rec_1 - 1/rec_2} \quad (2)$$

**Proof:** The slope of the line segment connecting the two classifiers in PRG space is

$$\frac{precG_1 - precG_2}{recG_1 - recG_2} = \frac{(1/prec_1 - 1/\pi) - (1/prec_2 - 1/\pi)}{(1/rec_1 - 1/\pi) - (1/rec_2 - 1/\pi)}$$

according to the first expression in Equation 3 in the main paper (the denominators cancel out). This slope is equal to  $-\beta^2$  according to Theorem 2 and establishes a line of constant  $FG_\beta$  and hence constant  $F_\beta$ . □
